# Supplementary material for: Tenascin C promotes valvular remodeling in two large animal models of ischemic mitral regurgitation
Source: PubMed Central journal article supplement (PMC7716900; doi:10.1007/s00395-020-00837-5), 2020-12-01

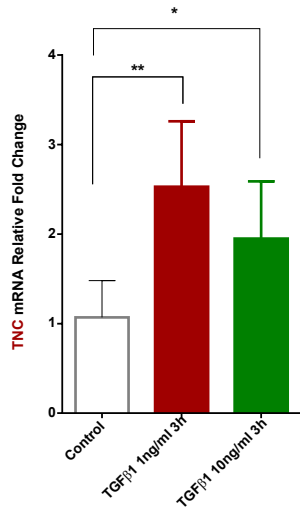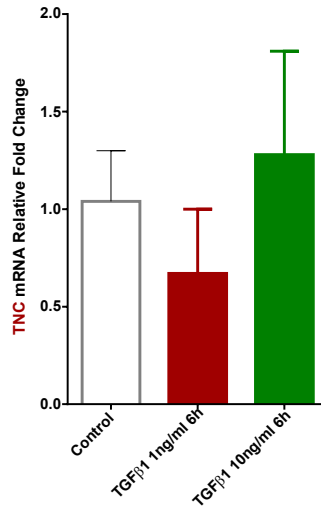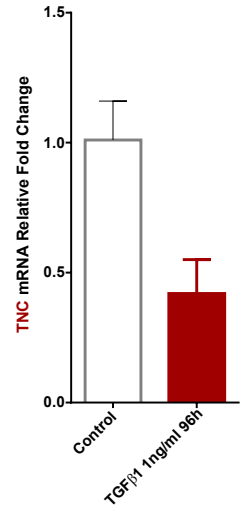

Supplement: 395_2020_837_MOESM2_ESM.pdf [file 395_2020_837_MOESM2_ESM.pdf]
